# Supplementary material for: Profiling of Antibiotic Residues in Surface Water of River Yamuna Stretch Passing through Delhi, India
Source: MDPI journal article supplement (doi:10.3390/w15030527), 2023-01-28
Supplement: s1 [file s1]

## Supplementary Materials

**Table S1.** Selected antibiotics and their physico-chemical properties.

| Class                   | Substances/<br>(CAS Number) | Molar Mass<br>[g/mol]                                                     | pK <sub>a</sub> | Log<br>K <sub>ow</sub> | Solubility in<br>water<br>[mg/L] | Half-Life (h)<br>in water |
|-------------------------|-----------------------------|---------------------------------------------------------------------------|-----------------|------------------------|----------------------------------|---------------------------|
| <b>β-Lactam</b>         | Amoxicillin<br>(26787-78-0) | C <sub>16</sub> H <sub>19</sub> N <sub>3</sub> O <sub>5</sub> S<br>365.41 | 2.4             | 0.97                   | 3.43                             | 7.2                       |
| <b>Macrolides</b>       | Erythromycin<br>(114-07-8)  | C <sub>37</sub> H <sub>67</sub> NO <sub>13</sub><br>733.95                | 8.88            | 3.0                    | 1.437                            | 3.5                       |
| <b>Fluoroquinolones</b> | Ofloxacin<br>(82419-36-1)   | C <sub>18</sub> H <sub>20</sub> FN <sub>3</sub> O <sub>4</sub><br>361.38  | 6.09            | -0.2                   | 28.3                             | 9                         |

**Table S2.** Showing studies on the existence of different antibiotic in surface waters.

| Antibiotic<br>Compound | Location     | Matrix        | Detection Method | Concentration<br>(ng/L) | Reference |
|------------------------|--------------|---------------|------------------|-------------------------|-----------|
| <b>Amoxicillin</b>     | Australia    | Surface water | HPLC-MS/MS       | 200                     | [26]      |
|                        | Hong Kong    | Surface water | HPLC-MS/MS       | 76                      | [27]      |
|                        | Italy        | Surface water | LC-MS/MS         | 5700                    | [28]      |
|                        | Portugal     | Surface water | LC-MS/MS         | 25000                   | [29]      |
|                        | Iran         | Surface water | LC-MS/MS         | 80                      | [30]      |
|                        | Kenya        | Surface water | LC-ESI-MS/ MS    | 14900                   | [31]      |
|                        | South Africa | Surface water | HPLC/MS          | 800                     | [32]      |
| <b>Ciprofloxacin</b>   | U.S.A        | Surface water | HPLC-MS/MS       | 30                      | [33]      |
|                        | Italy        | Surface water | LC-MS/MS         | 103                     | [15]      |
|                        | Australia    | Surface water | HPLC-MS/MS       | 1300                    | [26]      |
|                        | Brazil       | Surface water | HPLC-MS/MS       | 740                     | [34]      |
|                        | Hong Kong    | Surface water | HPLC-MS/MS       | 290                     | [35]      |
|                        | China        | Surface water | HPLC-MS/MS       | 7490                    | [36]      |
|                        | Serbia       | Surface water | HPLC-MS/MS       | 280                     | [37]      |
|                        | India        | Surface water | LC-MS/MS         | 5150                    | [38]      |
|                        | Iran         | Surface water | LC-MS/MS         | 1770                    | [30]      |
|                        | Spain        | Surface water | LC-MS/MS         | 100                     | [24]      |
|                        | Bangladesh   | Surface water | LC-MS/MS         | 1470                    | [39]      |
|                        | India        | Surface water | HPLC-MS/MS       | 5750                    | [40]      |

| Antibiotic Compound     | Location    | Matrix         | Detection Method | Concentration (ng/L) | Reference |
|-------------------------|-------------|----------------|------------------|----------------------|-----------|
| <b>Erythromycin</b>     | U.K         | Surface water  | HPLC–ESI-        | 10                   | [41]      |
|                         | India       | Surface water  | LC-MS/MS         | 1370                 | [42]      |
|                         | Serbia      | Surface water  | HPLC-MS          | 60                   | [43]      |
|                         | U.K         | Surface water  | LC-MS/MS         | 280                  | [44]      |
|                         | Taiwan      | Surface water  | HPLC-MS/MS       | 34800                | [45]      |
|                         | China       | Surface water  | LC-MS/MS         | 230                  | [46]      |
|                         | China       | Surface water  | HPLC-MS/MS       | 1600                 | [47]      |
|                         | China       | Surface water  | HPLC-MS/MS       | 2450                 | [48]      |
|                         | France      | Surface water  | UHPLC-MS/MS      | 2680                 | [49]      |
| <b>Ofloxacin</b>        | Italy       | Surface water  | HPLC-MS/MS       | 310                  | [50]      |
|                         | France      | Surface water  | LC-MS/MS         | 30000                | [51]      |
|                         | Hong Kong   | Surface water  | HPLC-MS/MS       | 180                  | [27]      |
|                         | India       | Surface water  | HPLC-MS/MS       | 15000                | [52]      |
|                         | U.K         | Surface water  | HPLC-MS/MS       | 17500                | [53]      |
|                         | Korea       | Surface water  | HPLC-MS/MS       | 51000                | [45]      |
|                         | India       | Surface water  | LC-MS/MS         | 11800                | [38]      |
|                         | Vietnam     | Surface water  | LC-MS/MS         | 5420                 | [54]      |
|                         | India       | Surface water  | UPLC             | 2050                 | [9]       |
|                         | China       | Surface water  | LC-MS/MS         | 15600                | [55]      |
| <b>Norfloxacin</b>      | Switzerland | Surface water  | HPLC-MS          | 45000                | [56]      |
|                         | USA         | Surface water  | HPLC-MS/MS       | 80                   | [57]      |
|                         | India       | Surface water  | HPLC-MS/MS       | 4700                 | [15]      |
|                         | Australia   | Surface water  | HPLC-MS/MS       | 11500                | [58]      |
|                         | China       | Surface water  | LC-MS/MS         | 4290                 | [59]      |
|                         | Brazil      | Surface water  | HPLC-MS/MS       | 510                  | [35]      |
|                         | U.K         | Surface water  | HPLC-MS/MS       | 280                  | [44]      |
|                         | China       | Surface water  | LC-MS/MS         | 4290                 | [60]      |
|                         | China       | Surface water  | HPLC-MS/MS       | 8340                 | [61]      |
|                         | India       | Surface water  | LC-MS/MS         | 25100                | [38]      |
|                         | India       | Surface water  | LC-MS/MS         | 8910                 | [62]      |
|                         | Spain       | Surface water  | HPLC-MS/MS       | 90                   | [63]      |
| <b>Sulfamethoxazole</b> | Germany     | Surface waters | HPLC–MS          | 410000               | [64]      |
|                         | Switzerland | Surface water  | HPLC-MS/MS       | 2800                 | [65]      |
|                         | USA         | Surface water  | HPLC-MS/MS       | 4500                 | [66]      |
|                         | Australia   | Surface water  | HPLC-MS/MS       | 20                   | [58]      |
|                         | Sweden      | Surface water  | LC-MS/MS         | 2330                 | [67]      |
|                         | Brazil      | Surface water  | LC-MS/MS         | 10                   | [68]      |
|                         | Portugal    | Surface water  | HPLC-MS/MS       | 4300                 | [69]      |
|                         | Bangladesh  | Surface water  | LC-MS/MS         | 9090                 | [70]      |
|                         | Sweden      | Surface water  | HPLC-MS/MS       | 2330                 | [71]      |
|                         | USA         | Surface water  | LC-MS/MS         | 9650                 | [72]      |
|                         | Vietnam     | Surface water  | LC-MS/MS         | 5850                 | [54]      |
|                         | Kenya       | Surface water  | LC-MS/MS         | 6800                 | [73]      |
|                         | Poland      | Surface water  | UHPLC-MS         | 7880                 | [74]      |

| Antibiotic Compound      | Location     | Matrix        | Detection Method | Concentration (ng/L) | Reference |
|--------------------------|--------------|---------------|------------------|----------------------|-----------|
| <b>Naproxen</b>          | Switzerland  | Surface water | GC–MS            | 10000                | [75]      |
|                          | Serbia       | Surface water | HPLC-MS/MS       | 7400                 | [37]      |
|                          | China        | Surface water | LC-MS/MS         | 3500                 | [76]      |
|                          | Portugal     | Surface water | HPLC-MS/MS       | 2600                 | [77]      |
|                          | South Africa | Surface water | LC-MS/MS         | 5930                 | [78]      |
| <b>Carbamazepine</b>     | Switzerland  | Surface water | LC-MS/MS         | 35000                | [75]      |
|                          | U.K          | Surface water | LC-MS/MS         | 2560                 | [79]      |
|                          | Serbia       | Surface water | HPLC-MS/MS       | 8700                 | [37]      |
|                          | China        | Surface water | HPLC-MS/MS       | 21500                | [80]      |
|                          | China        | Surface water | LC-MS/MS         | 1150                 | [76]      |
|                          | Portugal     | Surface water | LC-MS/MS         | 4300                 | [69]      |
|                          | Bangladesh   | Surface water | LC-MS/MS         | 880                  | [81]      |
|                          | USA          | Surface water | LC-MS/MS         | 170                  | [82]      |
|                          | Korea        | Surface water | LC-MS/MS         | 40                   | [83]      |
|                          | Spain        | Surface water | HPLC-MS/MS       | 260                  | [63]      |
| <b>Sulfadiazine</b>      | Denmark      | Surface water | LC-MS-MS         | 480                  | [84]      |
|                          | U.K          | Surface water | HPLC-MS/MS       | 4130                 | [79]      |
|                          | China        | Surface water | LC-MS/MS         | 1390                 | [85]      |
|                          | China        | Surface water | HPLC-MS/MS       | 260                  | [60]      |
|                          | USA          | Surface water | LC-MS/MS         | 250                  | [86]      |
|                          | Vietnam      | Surface water | ESI-LCMS/MS      | 450                  | [87]      |
|                          | China        | Surface water | HPLC-MS/MS       | 520                  | [88]      |
|                          |              |               |                  |                      |           |
| <b>Chlortetracycline</b> | U.S.A        | Surface water | GC–MS/MS         | 6900                 | [89]      |
|                          | China        | Surface water | RPLC-MS/MS       | 1220                 | [90]      |
|                          | Spain        | Surface water | LC-MS/MS         | 50                   | [63]      |
| <b>Lincomycin</b>        | U.S.A        | Surface water | GC–MS/MS         | 7300                 | [89]      |
|                          | Korea        | Surface water | LC-MS/MS         | 4840                 | [45]      |
|                          | Vietnam      | Surface water | LC-MS/MS         | 1160                 | [54]      |
|                          | Spain        | Surface water | HPLC-MS/MS       | 110                  | [63]      |
| <b>Roxithromycin</b>     | China        | Surface water | LC-MS/MS         | 8840                 | [60]      |
|                          | Sweden       | Surface water | HPLC-MS/MS       | 130                  | [70]      |
| <b>Trimethoprim</b>      | Denmark      | Surface water | LC-MS-MS         | 550                  | [84]      |
|                          | U.K          | Surface water | HPLC/MS          | 1080                 | [79]      |
|                          | Serbia       | Surface water | HPLC/MS          | 810                  | [37]      |
|                          | China        | Surface water | LC-MS/MS         | 1560                 | [76]      |
|                          | Vietnam      | Surface water | ESI-LC-MS/MS     | 170                  | [91]      |
|                          | Cyprus       | Surface water | LC-MS/MS         | 1300                 | [92]      |
|                          | India        | Surface water | LC-ESI-MS/MS     | 120                  | [31]      |
|                          | Spain        | Surface water | HPLC/MS          | 720                  | [63]      |

| Antibiotic Compound   | Location    | Matrix        | Detection Method | Concentration (ng/L) | Reference |
|-----------------------|-------------|---------------|------------------|----------------------|-----------|
| <b>Enrofloxacin</b>   | USA         | Surface water | HPLC-MS/MS       | 120                  | [93]      |
|                       | Australia   | Surface water | HPLC-MS/MS       | 3000                 | [58]      |
|                       | China       | Surface water | LC-MS/MS         | 270                  | [59]      |
|                       | China       | Surface water | HPLC-MS/MS       | 8770                 | [36]      |
|                       | Vietnam     | Surface water | ESI-LC-MS/MS     | 1400                 | [86]      |
|                       | India       | Surface water | LCMS/MS          | 1810                 | [38]      |
|                       | China       | Surface water | LC-MS/MS         | 450                  | [94]      |
|                       |             |               |                  |                      |           |
| <b>Clarithromycin</b> | Italy       | Surface water | HPLC-MS/MS       | 3200                 | [57]      |
|                       | Italy       | Surface water | HPLC-MS/MS       | 2300                 | [50]      |
|                       | Switzerland | Surface water | HPLC-MS/MS       | 140                  | [95]      |
|                       | Serbia      | Surface water | HPLC-MS/MS       | 6160                 | [37]      |
|                       | China       | Surface water | HPLC-MS/MS       | 1230                 | [80]      |
|                       | Portugal    | Surface water | HPLC-MS/MS       | 2680                 | [77]      |
|                       | Bangladesh  | Surface water | UPLC-MS/MS       | 9090                 | [96]      |
|                       | Portugal    | Surface water | HPLC-MS/MS       | 94900                | [97]      |
